# Supplementary material for: Infrared Thermography Imaging for Assessment of Peripheral Perfusion in Patients with Septic Shock
Source: MDPI journal article supplement (doi:10.3390/bioengineering10060729), 2023-06-18
Supplement: s1 [file s1]

# Infrared Thermography Imaging for Assessment of Peripheral Perfusion in Patients with Septic Shock

Sigita Kazune <sup>1,2,\*</sup>, Edgars Vasiljevs <sup>3</sup>, Anastasija Caica-Rinca <sup>2,4</sup>, Zbignevs Marcinkevics <sup>2,4</sup> and Andris Grabovskis <sup>4</sup>

<sup>1</sup> Department of Anesthesiology, Riga Stradins University, LV-1007 Riga, Latvia

<sup>2</sup> Laboratory of Biophotonics, Institute of Atomic Physics and Spectroscopy, University of Latvia, LV-1004 Riga, Latvia

<sup>3</sup> Residency Development Department, University of Latvia, LV-1004 Riga, Latvia

<sup>4</sup> Department of Human and Animal Physiology, Faculty of Biology, University of Latvia, LV-1004 Riga, Latvia; andris.grabovskis@lu.lv

\* Correspondence: sk13171@edu.lu.lv

**Table S1.** General linear mixed model tests the effects of measurement zone and mottling score on skin surface temperature.

| Variable         | F        | df   | P                 |
|------------------|----------|------|-------------------|
| Intercept        | 46457.31 | 1317 | <b>&lt;0.0001</b> |
| Measurement zone | 14.48    | 3317 | <b>&lt;0.0001</b> |
| Mottling score   | 2.27     | 3317 | 0.08              |

Degrees of freedom (df; numerator, denominator) are shown for the F statistic. Bold P values indicate significant effects ( $\alpha = 0.05$ )

**Table S2.** General linear mixed model tests the effects of measurement zone, 28-day survival status and mottling score on skin surface temperature.

| Variable                         | F        | df   | P                 |
|----------------------------------|----------|------|-------------------|
| Intercept                        | 49943.78 | 1313 | <b>&lt;0.0001</b> |
| Measurement zone                 | 14.48    | 3313 | <b>&lt;0.0001</b> |
| Survival status                  | 0.73     | 1313 | 0.40              |
| Mottling score                   | 2.46     | 3313 | 0.06              |
| Survival status × mottling score | 3.57     | 3313 | <b>0.01</b>       |

Degrees of freedom (df; numerator, denominator) are shown for the F statistic. Bold P values indicate significant effects ( $\alpha = 0.05$ )
